# Supplementary material for: Emergence of Structural Patterns in Neutral Trophic Networks
Source: PubMed Central journal article supplement (PMC3416803; doi:10.1371/journal.pone.0038295), 2012-08-10
Supplement: pone.0038295.s001.pdf [file pone.0038295.s001.pdf]

## **Supporting information S1:** Temporal autocorrelation of assembled network characteristics

For each simulation we tested for temporal autocorrelation of community ( $S_{prey}$ ,  $S_{pred}$ ,  $E_{prey}$ ,  $E_{pred}$ ) and network ( $L$ , and  $C$ ) characteristics by correlating values separated by lags of 1 to 10000 time steps (with the ‘acf’ function of the package ‘stats’ developed in the R package [1]).

For an immigration rate of  $m = 10^{-5}$ , we found that temporal autocorrelation (*acf*) of all descriptors ( $S_{prey}$ ,  $S_{pred}$ ,  $E_{prey}$ ,  $E_{pred}$ ,  $L$ ,  $C$ ) ranged between -0.09 and 0.14 (*acf* was between -0.094 and 0.105 for  $S_{prey}$ ; -0.062 to 0.140 for  $S_{pred}$ ; -0.062 to 0.127 for  $E_{prey}$ ; 0.050 to 0.042 for  $E_{pred}$ ; -0.117 to 0.108 for  $L$ ; -0.076 to 0.126 for  $C$ ; Figure S1), except for small lags (from 1 to 100). This result was expected because our model followed a process whereby state at time  $t$  depends on the state at time  $t-1$ . Temporal fluctuation patterns due to the stochastic nature of our neutral dynamics showed no sign of limit cycles.

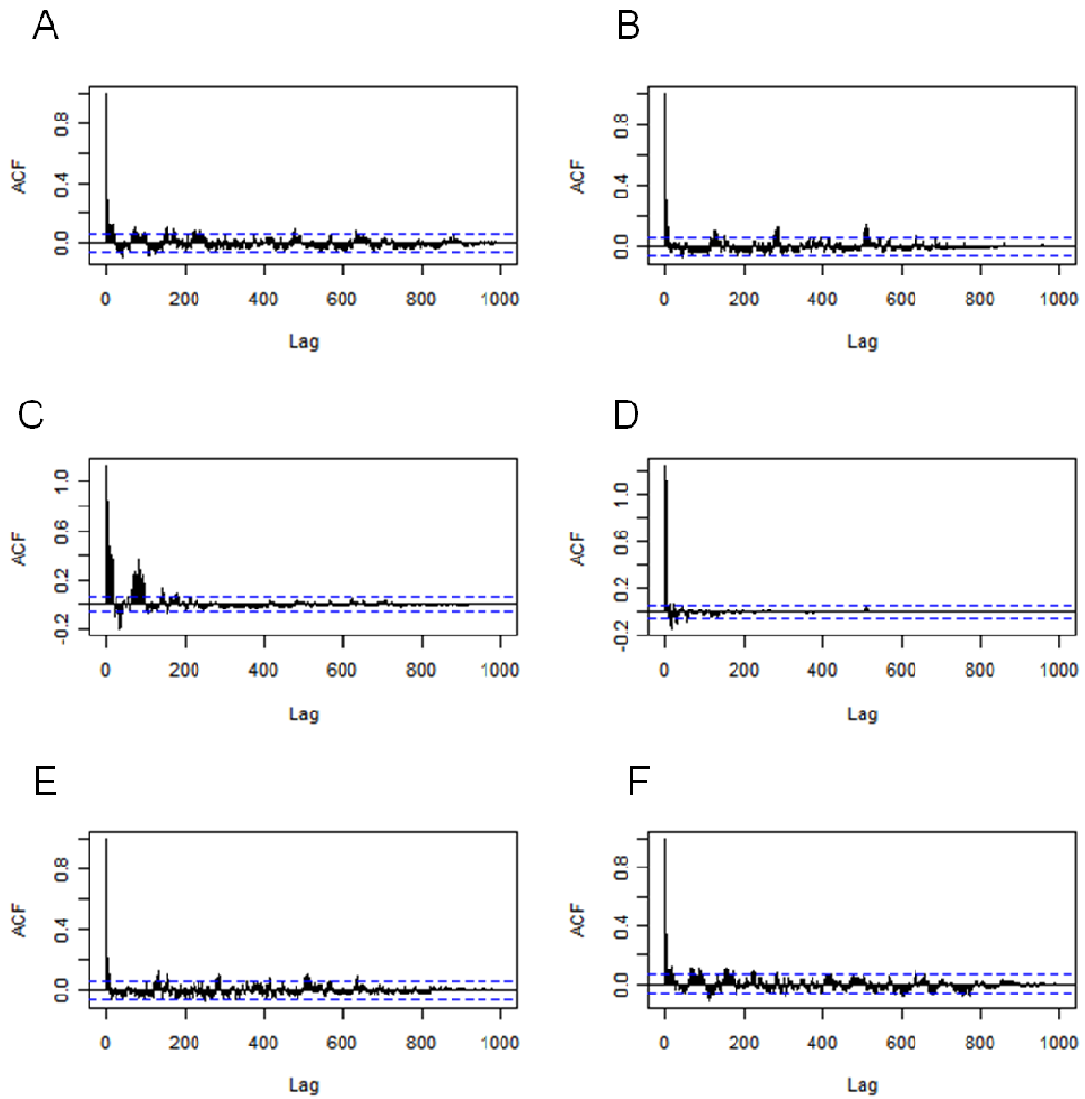

Figure S1. Estimates of temporal autocorrelation for one simulation example with  $m = 10^{-5}$ , for (A) prey species number  $S_{prey}$ , (B) predator species number  $S_{pred}$ , (C) prey abundance evenness  $E_{prey}$ , (D) predator abundance evenness  $E_{pred}$ , (E) number of realized links  $L$ , and (F) network connectance  $C$ .
